# Supplementary material for: Event-Based Update of Synapses in Voltage-Based Learning Rules
Source: PubMed Central journal article supplement (PMC8222618; doi:10.3389/fninf.2021.609147), 2021-06-10
Supplement: Table_1.pdf [file Table_1.pdf]

***Event-based update of synapses in voltage-based learning rules: Supplementary Material***

| <b>A: Simulation parameters</b>                |                                      |                                                              |
|------------------------------------------------|--------------------------------------|--------------------------------------------------------------|
| <b>Symbol</b>                                  | <b>Value</b>                         | <b>Description</b>                                           |
| $f_{\text{pair}}$                              | [10, 11, ..., 50] Hz                 | frequency of occurrence of spike pairs                       |
| $\Delta t$                                     | $\pm 10$ ms                          | time shift of spike pair                                     |
| $w_{\text{init}}$ [mV]                         | 0.5 mV or pA/ms                      | initial weight (unit is mV for aeif and pA/ms for hh neuron) |
| <b>B: Parameters of aeif_psc_delta_clopath</b> |                                      |                                                              |
| <b>Symbol</b>                                  | <b>Value</b>                         | <b>Description</b>                                           |
| $E_L$                                          | -54.402 mV                           | leak reversal potential                                      |
| $E_{\text{Na}}$                                | 50.0 mV                              | sodium reversal potential                                    |
| $E_K$                                          | -77.0 mV                             | potassium reversal potential                                 |
| $g_L$                                          | 30.0 nS                              | leak conductance                                             |
| $g_{\text{Na}}$                                | $12 \cdot 10^3$ nS                   | sodium peak conductance                                      |
| $g_K$                                          | $3.6 \cdot 10^3$ nS                  | potassium peak conductance                                   |
| $C_m$                                          | 100 pF                               | membrane capacitance                                         |
| $\tau_{\text{ex}}$                             | 0.2 ms                               | rise time of the exc. synaptic alpha funct.                  |
| $\tau_{\text{in}}$                             | 2.0 ms                               | rise time of the inh. synaptic alpha funct.                  |
| $\theta_-$                                     | -64.9 mV                             | threshold                                                    |
| $\theta_+$                                     | -35 mV                               | threshold                                                    |
| $A_{\text{LTD}}$                               | $1 \cdot 10^{-4}$ 1/mV               | amplitude of LTD                                             |
| $A_{\text{LTP}}$                               | $12 \cdot 10^{-4}$ 1/mV <sup>2</sup> | amplitude of LTP                                             |
| $\tau_-$                                       | 10 ms                                | time constant of $\bar{u}_-$                                 |
| $\tau_+$                                       | 114 ms                               | time constant of $\bar{u}_+$                                 |
| $\tau_s$                                       | 15 ms                                | time constant of $s_j^*$                                     |
| $d_s$                                          | 5 ms                                 | delay of $\bar{u}_{\pm}$                                     |
| <b>C: Parameters of hh_psc_alpha_clopath</b>   |                                      |                                                              |
| <b>Symbol</b>                                  | <b>Value</b>                         | <b>Description</b>                                           |
| $E_L$                                          | -70.6 mV                             | leak reversal potential                                      |
| $g_L$                                          | 30 nS                                | leak conductance                                             |
| $C_m$                                          | 281 pF                               | membrane capacitance                                         |
| $V_{\text{reset}}$                             | -60 mV                               | reset value of membr. pot. after spike                       |
| $V_{\text{peak}}$                              | 33 mV                                | spike detection threshold                                    |
| $\Delta T$                                     | 2 mV                                 | slope factor                                                 |
| $\tau_w$                                       | 144 ms                               | spike adaptation time constant                               |
| $\tau_z$                                       | 40 ms                                | spike adaptation time constant                               |
| $V_{\text{th,max}}$                            | 30.4 mV                              | threshold potential after spike                              |
| $\tau_{V,\text{th}}$                           | 50 ms                                | threshold potential time constant                            |
| $a$                                            | 4 nS                                 | subthreshold adaptation                                      |
| $b$                                            | 0.0805 pA                            | spike triggered adaptation                                   |
| $\theta_-$                                     | -70.6 mV                             | threshold of $\bar{u}_-$                                     |
| $\theta_+$                                     | -45.3 mV                             | threshold of $\bar{u}_+$                                     |
| $A_{\text{LTD}}$                               | $14 \cdot 10^{-5}$ 1/mV              | amplitude of LTD                                             |
| $A_{\text{LTP}}$                               | $8 \cdot 10^{-5}$ 1/mV <sup>2</sup>  | amplitude of LTP                                             |
| $\tau_-$                                       | 10 ms                                | time constant of $\bar{u}_-$                                 |
| $\tau_+$                                       | 7 ms                                 | time constant of $\bar{u}_+$                                 |
| $\tau_s$                                       | 15 ms                                | time constant of $s_j^*$                                     |
| $d_s$                                          | 4 ms                                 | delay of $\bar{u}_{\pm}$                                     |

**Table S1. Parameters of the spike pairing experiment using the Clopath rule.** The values for the aeif model are taken from (Clopath et al., 2010, Tab. 1 and appendix) and those for the hh model are extracted from the reference implementation by B. Torben-Nielson on ModelDB (Hines et al., 2004).

| <b>A: Model summary</b> |                                                                               |                                  |                            |
|-------------------------|-------------------------------------------------------------------------------|----------------------------------|----------------------------|
| <b>Populations</b>      | Three: excitatory, inhibitory, external input                                 |                                  |                            |
| <b>Connectivity</b>     | all-to-all, fixed out-degree, fixed in-degree                                 |                                  |                            |
| <b>Neuron model</b>     | adaptive exponential integrate-and-fire (aeif, Clopath)                       |                                  |                            |
| <b>Plasticity</b>       | Clopath synapse/                                                              |                                  |                            |
| <b>Input</b>            | independent homogeneous Poisson spike trains                                  |                                  |                            |
| <b>Measurements</b>     | synapse weight                                                                |                                  |                            |
| <b>B: Populations</b>   |                                                                               |                                  |                            |
| <b>Name</b>             | <b>Elements</b>                                                               | <b>Population size</b>           |                            |
| E                       | aeif/two-comp.                                                                | $N_E = 10$                       |                            |
| I                       | aeif/two-comp.                                                                | $N_I = 3$                        |                            |
| $E_{\text{ext}}$        | Poisson generator                                                             | $N_p = 500$                      |                            |
| <b>C: Connectivity</b>  |                                                                               |                                  |                            |
| <b>Name</b>             | <b>Source</b>                                                                 | <b>Target</b>                    | <b>Pattern</b>             |
| ExcExc                  | E                                                                             | E                                | all-to-all (no autapses)   |
| ExcInh                  | E                                                                             | I                                | fixed in-degree $C_E = 8$  |
| InhExc                  | I                                                                             | E                                | fixed out-degree $C_I = 6$ |
| ExtExc                  | $E_{\text{Ext}}$                                                              | E                                | all-to-all                 |
| ExtInh                  | $E_{\text{Ext}}$                                                              | I                                | all-to-all                 |
| <b>D: Neurons</b>       |                                                                               |                                  |                            |
| <b>Name</b>             | aeif_psc_delta_clopath                                                        |                                  |                            |
| <b>Type</b>             | adaptive exponential integrate-and-fire                                       |                                  |                            |
| <b>Details</b>          | see <a href="#">Clopath et al. (2010)</a>                                     |                                  |                            |
| <b>Parameters</b>       | see <a href="#">Table S3</a>                                                  |                                  |                            |
| <b>E: Synapses</b>      |                                                                               |                                  |                            |
| <b>Name</b>             | <b>Model</b>                                                                  | <b>Initial weight [mV]</b>       | <b>Max. weight [mV]</b>    |
| ExcExc                  | clopath_synapse                                                               | 0.25                             | 0.75                       |
| ExcInh                  | static_synapse                                                                | 1.0                              | —                          |
| InhExc                  | static_synapse                                                                | 1.0                              | —                          |
| ExtExc                  | clopath_synapse                                                               | random uniform from $[0.5, 1.5]$ | 3.0                        |
| ExtInh                  | static_synapse                                                                | random uniform from $[0.0, 0.5]$ | —                          |
| <b>F: Input</b>         |                                                                               |                                  |                            |
| <b>Type</b>             | Poisson generator                                                             |                                  |                            |
| <b>Description</b>      | homogeneous Poisson spike trains, independent for each neuron, modulated rate |                                  |                            |
| <b>Parameters</b>       | see <a href="#">Table S3</a>                                                  |                                  |                            |

**Table S2. Model description of a small excitatory-inhibitory network after Nordlie et al. (2009).** This network reproduces the emergence of strong bidirectional couplings using the Clopath rule shown in Figure 7. The values of the parameters are shown in [Table S3](#).

| <b>A: Parameters of aeif_psc_delta_clopath</b> |                                  |                                                               |
|------------------------------------------------|----------------------------------|---------------------------------------------------------------|
| <b>Symbol</b>                                  | <b>Value</b>                     | <b>Description</b>                                            |
| $E_L$                                          | -70.6 mV                         | leak reversal potential                                       |
| $g_L$                                          | 30 nS                            | leak conductance                                              |
| $C_m$                                          | 281 pF                           | membrane capacitance                                          |
| $V_{\text{reset}}$                             | -60 mV                           | reset value of membr. pot. after spike                        |
| $V_{\text{peak}}$                              | 20 mV                            | spike detection threshold                                     |
| $\Delta_T$                                     | 2 mV                             | slope factor                                                  |
| $\tau_w$                                       | 144 ms                           | spike adaptation time constant                                |
| $\tau_z$                                       | 40 ms                            | spike adaptation time constant                                |
| $V_{\text{th,max}}$                            | 30.4 mV                          | threshold potential after spike                               |
| $\tau_{V,\text{th}}$                           | 50 ms                            | threshold potential time constant                             |
| $a$                                            | 4 nS                             | subthreshold adaptation                                       |
| $b$                                            | 0.0805 pA                        | spike triggered adaptation                                    |
| $\theta_-$                                     | -70.6 mV                         | threshold of $\bar{u}_-$                                      |
| $\theta_+$                                     | -45.3 mV                         | threshold of $\bar{u}_+$                                      |
| $A_{\text{LTD}}$                               | $14 \cdot 10^{-5} \text{ 1/mV}$  | amplitude of LTD                                              |
| $u_{\text{ref}}$                               | 60                               | reference value for $\bar{u}$                                 |
| $\bar{\tau}$                                   | $1.5 \cdot 10^3 \text{ ms}$      | time constant of $\bar{u}$                                    |
| $A_{\text{LTP}}$                               | $8 \cdot 10^{-5} \text{ 1/mV}^2$ | amplitude of LTP                                              |
| $\tau_-$                                       | 10 ms                            | time constant of $\bar{u}_-$                                  |
| $\tau_+$                                       | 7 ms                             | time constant of $\bar{u}_+$                                  |
| $\tau_s$                                       | 15 ms                            | time constant of $s_j^*$                                      |
| $d_s$                                          | 4 ms                             | delay of $\bar{u}_\pm$                                        |
| <b>B: Input parameters</b>                     |                                  |                                                               |
| <b>Symbol</b>                                  | <b>Value</b>                     | <b>Description</b>                                            |
| $A_p$                                          | 66 [Hz]                          | amplitude of Gaussian rate profile                            |
| $\sigma_p$                                     | 10                               | width of Gaussian rate profile                                |
| $c_p$                                          | 0.48 [Hz]                        | offset of Gaussian rate profile                               |
| $s_p$                                          | [25, 75, ..., 475]               | set of possible values for the center of the Gaussian $\mu_p$ |
| $t_\mu$                                        | 100 [ms]                         | interval after which a new value for $\mu_p$ is drawn         |
| $N_\mu$                                        | 100                              | number of intervals $t_\mu$                                   |

**Table S3. Neuron and input parameters for simulation of network producing bidirectional connections using the Clopath rule.** The values are taken from (Clopath et al., 2010, Tab. 1 and appendix). The same values are used for the performance measurements shown in Figures 9 and 10.

| <b>A: Simulation parameters</b>                             |                                                                                                     |                                                     |
|-------------------------------------------------------------|-----------------------------------------------------------------------------------------------------|-----------------------------------------------------|
| <b>Symbol</b>                                               | <b>Value</b>                                                                                        | <b>Description</b>                                  |
| $T_p$                                                       | 1000 ms                                                                                             | pattern duration                                    |
| $N_{\text{rep}}$                                            | 100                                                                                                 | number of pattern repetitions                       |
| $N_p$                                                       | 200                                                                                                 | number of input spike trains                        |
| $f_p$                                                       | 10 Hz                                                                                               | input firing rate                                   |
| $w_{gE}$                                                    | $(18 \sin(2\pi t) + 4.8)$ nS                                                                        | weights to generate periodic excitatory conductance |
| $w_{gI}$                                                    | 3 nS                                                                                                | weights to generate constant inhibitory conductance |
| <b>B: Parameters of pp_cond_exp_mc_urbanczik (soma)</b>     |                                                                                                     |                                                     |
| <b>Symbol</b>                                               | <b>Value</b>                                                                                        | <b>Description</b>                                  |
| $C_m$                                                       | 300 pF                                                                                              | membrane capacitance                                |
| $E_L$                                                       | -70 mV                                                                                              | leak reversal potential                             |
| $g_L$                                                       | 30.0 nS                                                                                             | leak conductance                                    |
| $E_{\text{ex}}$                                             | 0.0 mV                                                                                              | exc. reversal potential                             |
| $E_{\text{in}}$                                             | -75.0 mV                                                                                            | inh. reversal potential                             |
| $\tau_{\text{ex}}$                                          | 3.0 ms                                                                                              | rise time of the exc. synaptic alpha funct.         |
| $\tau_{\text{in}}$                                          | 3.0 ms                                                                                              | rise time of the inh. synaptic alpha funct.         |
| $t_{\text{ref}}$                                            | 3.0 ms                                                                                              | refractory time                                     |
| <b>C: Parameters of pp_cond_exp_mc_urbanczik (dendrite)</b> |                                                                                                     |                                                     |
| <b>Symbol</b>                                               | <b>Value</b>                                                                                        | <b>Description</b>                                  |
| $C_m$                                                       | 300 pF                                                                                              | membrane capacitance                                |
| $E_L$                                                       | -70 mV                                                                                              | leak reversal potential                             |
| $g_L$                                                       | 30.0 nS                                                                                             | leak conductance                                    |
| $\tau_{\text{ex}}$                                          | 3.0 ms                                                                                              | rise time of the exc. synaptic alpha funct.         |
| $\tau_{\text{in}}$                                          | 3.0 ms                                                                                              | rise time of the inh. synaptic alpha funct.         |
| $\phi(U)$                                                   | $\frac{0.15 \text{ kHz}}{1 + \frac{1}{2} \exp\left(\frac{-55 \text{ mV} - U}{3 \text{ mV}}\right)}$ | rate function                                       |
| $g_{\text{sp}}$                                             | 600.0 nS                                                                                            | coupling dendrite to soma                           |

**Table S4. Parameters of the simulation of the learning experiment using the Urbanczik-Senn rule.** The same values of the neuron parameters are used for the performance measurements shown in Figures 11 and 12.

| <b>A: Model summary</b> |                                                                                                                 |                        |                       |                 |
|-------------------------|-----------------------------------------------------------------------------------------------------------------|------------------------|-----------------------|-----------------|
| <b>Populations</b>      | Three: excitatory, inhibitory, external input                                                                   |                        |                       |                 |
| <b>Connectivity</b>     | random with fixed indegree                                                                                      |                        |                       |                 |
| <b>Neuron model</b>     | adaptive exponential integrate-and-fire (aeif, Clopath)/<br>two-compartment Poisson (two-comp., Urbanczik-Senn) |                        |                       |                 |
| <b>Plasticity</b>       | Clopath synapse/<br>Urbanczik-Senn synapse                                                                      |                        |                       |                 |
| <b>Input</b>            | independent homogeneous Poisson spike trains                                                                    |                        |                       |                 |
| <b>Measurements</b>     | —                                                                                                               |                        |                       |                 |
| <b>B: Populations</b>   |                                                                                                                 |                        |                       |                 |
| <b>Name</b>             | <b>Elements</b>                                                                                                 | <b>Population size</b> |                       |                 |
| E                       | aeif/two-comp.                                                                                                  | $N_E = 4N_I$           |                       |                 |
| I                       | aeif/two-comp.                                                                                                  | $N_I$                  |                       |                 |
| E <sub>ext</sub>        | Poisson<br>generator                                                                                            | 1                      |                       |                 |
| <b>C: Connectivity</b>  |                                                                                                                 |                        |                       |                 |
| <b>Name</b>             | <b>Source</b>                                                                                                   | <b>Target</b>          | <b>Pattern</b>        | <b>Weight</b>   |
| Exc                     | E                                                                                                               | E+I                    | fixed in-degree $C_E$ | $J_{\text{ex}}$ |
| Inh                     | I                                                                                                               | E+I                    | fixed in-degree $C_I$ | $J_{\text{in}}$ |
| Ext                     | E <sub>Ext</sub>                                                                                                | E+I                    | all-to-all            | $J$             |
| <b>D: Neurons</b>       |                                                                                                                 |                        |                       |                 |
| <b>Name</b>             | aeif_psc_delta_clopath                                                                                          |                        |                       |                 |
| <b>Type</b>             | adaptive exponential integrate-and-fire                                                                         |                        |                       |                 |
| <b>Details</b>          | see <a href="#">Clopath et al. (2010)</a>                                                                       |                        |                       |                 |
| <b>Parameters</b>       | see <a href="#">Table S3</a>                                                                                    |                        |                       |                 |
| <b>Name</b>             | pp_cond_exp_mc_urbanczik                                                                                        |                        |                       |                 |
| <b>Type</b>             | two-compartment neuron with spike generation via inhomogeneous<br>Poisson process                               |                        |                       |                 |
| <b>Details</b>          | see <a href="#">Urbanczik and Senn (2014)</a>                                                                   |                        |                       |                 |
| <b>Parameters</b>       | see <a href="#">Table S4</a>                                                                                    |                        |                       |                 |
| <b>E: Synapses</b>      |                                                                                                                 |                        |                       |                 |
| <b>Name</b>             | <b>Model</b>                                                                                                    |                        |                       |                 |
| Exc                     | clopath/urbanczik_synapse                                                                                       |                        |                       |                 |
| Inh                     | clopath/urbanczik_synapse                                                                                       |                        |                       |                 |
| Ext                     | static_synapse                                                                                                  |                        |                       |                 |
| <b>F: Input</b>         |                                                                                                                 |                        |                       |                 |
| <b>Type</b>             | <b>Description</b>                                                                                              |                        |                       |                 |
| Poisson generator       | homogeneous Poisson spike trains, independent for each neuron, rate<br>$f_{\text{ext}} = \nu_{\text{ext}} C_E$  |                        |                       |                 |

**Table S5. Model description of Brunel network after Nordlie et al. (2009).** This network is used to produce the performance measurement shown in Figures 9, 10, 11, and 12. The values of the parameters are shown in [Table S6](#).

| A: Global simulation parameters |                         |                                                                                                                                                                      |
|---------------------------------|-------------------------|----------------------------------------------------------------------------------------------------------------------------------------------------------------------|
| Symbol                          | Value                   | Description                                                                                                                                                          |
| $T$                             | $2 \cdot 10^3$ ms       | biological time                                                                                                                                                      |
| $h$                             | 0.1 ms                  | resolution                                                                                                                                                           |
| B: Network sizes                |                         |                                                                                                                                                                      |
| Symbol                          | Value                   | Description                                                                                                                                                          |
| $N = N_E + N_I$                 | $1.92 \cdot 10^6$       | number of neurons in Clopath simulation with small indegree $K = 100$                                                                                                |
| $N$                             | $1.54 \cdot 10^5$       | number of neurons in Clopath simulation with large indegree $K = 5000$                                                                                               |
| $N$                             | $3.84 \cdot 10^5$       | number of neurons in Urbanczik simulation with small indegree $K = 100$                                                                                              |
| $N$                             | $3.84 \cdot 10^4$       | number of neurons in Urbanczik simulation with large indegree $K = 5000$                                                                                             |
| C: Connectivity                 |                         |                                                                                                                                                                      |
| Symbol                          | Value                   | Description                                                                                                                                                          |
| $g$                             | 7.0                     | ratio inh./exc. weight                                                                                                                                               |
| $J$                             | 0.1                     | postsynaptic amplitude<br>The unit depends on the neuron model. In case of the aeif model and the Clopath rule it is [mV] and for the Urbanczik-Senn rule it is [pA] |
| $J_{\text{ex}}$                 | $J$                     | amplitude of exc. postsyn. potential                                                                                                                                 |
| $J_{\text{in}}$                 | $-gJ_{\text{ex}}$       | amplitude of inh. postsyn. potential                                                                                                                                 |
| $K = C_E + C_I$                 | 100 or 5000             | total number of excitatory synapses per neuron                                                                                                                       |
| $C_E$                           | $0.8K$                  | number of excitatory synapses per neuron                                                                                                                             |
| $C_I$                           | $0.2K$                  | number of inhibitory synapses per neuron                                                                                                                             |
| $\eta$                          | 0.0                     | learning rate                                                                                                                                                        |
| D: External input               |                         |                                                                                                                                                                      |
| Symbol                          | Value                   | Description                                                                                                                                                          |
| $\nu_{\text{ext}}$              | $6.75 \cdot 10^{-3}$ Hz | factor in rate of external Poisson input $f_{\text{ext}} = \nu_{\text{ext}} C_E$                                                                                     |

Table S6. Parameters of the Brunel network.

## REFERENCES

- Clopath, C., Büsing, L., Vasilaki, E., and Gerstner, W. (2010), Connectivity reflects coding: a model of voltage-based STDP with homeostasis, *Nat. Neurosci.*, 13, 344–352
- Hines, M. L., Morse, T., Migliore, M., Carnevale, N. T., and Shepherd, G. M. (2004), ModelDB: A database to support computational neuroscience, *J. Comput. Neurosci.*, 17, 1, 7–11, doi:10.1023/B:JCNS.0000023869.22017.2e
- Nordlie, E., Gewaltig, M.-O., and Plesser, H. E. (2009), Towards reproducible descriptions of neuronal network models, *PLOS Comput. Biol.*, 5, 8, e1000456, doi:10.1371/journal.pcbi.1000456
- Urbanczik, R. and Senn, W. (2014), Learning by the dendritic prediction of somatic spiking, *Neuron*, 81, 3, 521–528
